# Supplementary material for: Breakfast Size and Prevalence of Metabolic Syndrome in the European Prospective Investigation into Cancer and Nutrition (EPIC) Spanish Cohort
Source: MDPI journal article supplement (doi:10.3390/nu15030630), 2023-01-26
Supplement: s1 [file s1]

**Supplemental Table S1. Descriptive dietary information by Metabolic Syndrome**

|                               |                      | Metabolic syndrome (MetS) <sup>1</sup> |                        | <i>p</i><br>value <sup>2</sup> |
|-------------------------------|----------------------|----------------------------------------|------------------------|--------------------------------|
|                               |                      | No (n = 2,160)                         | Yes (n = 1,484)        |                                |
| Dietary intake at breakfast   |                      |                                        |                        |                                |
| Macronutrients (g/breakfast)  |                      |                                        |                        |                                |
|                               | Total carbohydrates  | 50.39 (36.86- 66.88)                   | 46.36 (33.81- 61.68)   | <0.001                         |
|                               | Simple carbohydrates | 24.83 (16.37- 34.93)                   | 21.01 (13.87- 30.36)   | <0.001                         |
|                               | Fibre                | 3.38 (1.96- 5.55)                      | 2.86 (1.66- 5.07)      | <0.001                         |
|                               | Total proteins       | 12.62 (9.19- 16.20)                    | 12.25 (9.12- 16.01)    | 0.196                          |
|                               | Animal protein       | 6.60 (3.30- 9.28)                      | 6.60 (4.00- 9.57)      | 0.204                          |
|                               | Plant-based protein  | 6.02 (3.75- 8.10)                      | 5.75 (3.30- 7.59)      | 0.001                          |
|                               | Fats                 | 10.94 (6.06- 17.46)                    | 10.62 (6.07- 16.59)    | 0.455                          |
|                               | Saturated fats       | 3.20 (1.64- 5.43)                      | 3.26 (1.76- 5.55)      | 0.541                          |
|                               | Monounsaturated fats | 4.25 (1.88- 7.27)                      | 4.24 (1.81- 7.41)      | 0.964                          |
|                               | Polyunsaturated fats | 1.25 (0.69- 2.41)                      | 1.21 (0.64- 2.22)      | 0.048                          |
| Dietary intake at full day    |                      |                                        |                        |                                |
| Macronutrient composition (%) |                      |                                        |                        |                                |
|                               | Proteins             | 18.31 (16.90- 19.95)                   | 18.46 (17.01- 20.16)   | 0.057                          |
|                               | Carbohydrates        | 41.60 (37.91- 45.53)                   | 41.41 (37.75- 45.08)   | 0.102                          |
|                               | Fats                 | 36.91 (33.25- 40.53)                   | 36.80 (33.52- 40.26)   | 0.850                          |
| Macronutrients (g/day)        |                      |                                        |                        |                                |
|                               | Total carbohydrates  | 248.84 (218.59-282.88)                 | 257.25 (225.79-291.05) | <0.001                         |
|                               | Simple carbohydrates | 94.51 (77.51-112.45)                   | 90.30 (74.30-109.13)   | <0.001                         |
|                               | Fibre                | 36.29 (30.31- 43.83)                   | 37.15 (30.54- 43.88)   | 0.244                          |
|                               | Total proteins       | 110.12 (96.63-124.71)                  | 115.19 (102.24-131.02) | <0.001                         |
|                               | Animal proteins      | 66.26 (54.81- 79.41)                   | 70.23 (59.16- 83.41)   | <0.001                         |
|                               | Plant-based proteins | 43.01 (36.88- 49.92)                   | 44.76 (38.18- 52.01)   | <0.001                         |
|                               | Fats                 | 97.61 (83.00-114.85)                   | 101.47 (86.73-119.05)  | <0.001                         |
|                               | Saturated fats       | 25.61 (20.86- 31.88)                   | 27.14 (22.04- 33.56)   | <0.001                         |
|                               | Monounsaturated fats | 44.25 (36.67- 52.77)                   | 46.00 (38.59- 54.11)   | <0.001                         |
|                               | Polyunsaturated fats | 17.17 (13.54- 22.42)                   | 17.65 (13.86- 22.51)   | 0.158                          |

Data are expressed in median (p25-p75).

<sup>1</sup>Metabolic Syndrome (MetS) was defined according to the National Cholesterol Education Program's Adult Treatment Panel III (ATP III) definition. It was considered present (Yes) when an individual fulfilled three or more of the following diagnostic criteria: waist circumference  $\geq 102$  cm in men and  $\geq 88$  cm in women; triglycerides  $\geq 150$  mg/dl (1.695 mmol/l); HDL-cholesterol  $< 40$  mg/dl (0.9 mmol/l) in men and  $< 50$  mg/dl (1.1 mmol/l) in women; blood pressure  $\geq 130/85$  mmHg; and fasting glucose  $\geq 100$  mg/dl ( $\geq 6.1$  mmol/l).

<sup>2</sup>p value: Wilcoxon rank test

<sup>3</sup>Breakfast size was calculated as: (energy from breakfast/total energy intake)\*2,000kcal

**Supplemental Table S2. Descriptive dietary information by quartiles of breakfast size (x2000kcal)**

|                                    |                      | Breakfast size (*2,000 kcal) <sup>1</sup> |                           |                           |                       | p value <sup>2</sup> |
|------------------------------------|----------------------|-------------------------------------------|---------------------------|---------------------------|-----------------------|----------------------|
|                                    |                      | Q1 (<222)<br>(n=911)                      | Q2 (222-296.3)<br>(n=911) | Q3 (296.4-384)<br>(n=911) | Q4 (>384)<br>(n=911)  |                      |
| Dietary intake at breakfast        |                      |                                           |                           |                           |                       |                      |
| Macronutrient intake (g/breakfast) |                      |                                           |                           |                           |                       |                      |
|                                    | Total carbohydrates  | 27.64 (17.52- 36.63)                      | 44.82 (37.75- 53.48)      | 56.13 (46.90- 66.63)      | 72.11 (57.76- 87.90)  | <0.001               |
|                                    | Simple carbohydrates | 15.69 (9.83- 22.26)                       | 21.39 (14.94- 28.44)      | 26.68 (18.52- 35.52)      | 32.88 (22.83- 45.71)  | <0.001               |
|                                    | Fibre                | 1.37 (0.20- 2.85)                         | 2.73 (1.82- 4.53)         | 3.71 (2.45- 5.55)         | 5.30 (3.47- 7.82)     | <0.001               |
|                                    | Total proteins       | 7.39 (4.89- 10.10)                        | 11.71 (9.65- 13.77)       | 13.83 (11.63- 16.51)      | 17.07 (13.68- 21.21)  | <0.001               |
|                                    | Animal proteins      | 4.96 (1.64- 6.60)                         | 6.60 (4.14- 8.28)         | 6.64 (5.03- 9.67)         | 7.21 (4.81- 10.56)    | <0.001               |
|                                    | Plant-based proteins | 2.24 (0.92- 4.21)                         | 5.24 (3.92- 6.60)         | 6.53 (5.15- 8.10)         | 8.92 (6.69- 12.46)    | <0.001               |
|                                    | Fats                 | 4.47 (1.69- 7.50)                         | 10.04 (6.66- 13.31)       | 13.02 (9.08- 17.86)       | 20.49 (14.10- 28.03)  | <0.001               |
|                                    | Saturated fats       | 1.60 (0.34- 3.03)                         | 2.97 (1.72- 4.62)         | 3.75 (2.19- 5.74)         | 5.46 (3.22- 8.20)     | <0.001               |
|                                    | Monounsaturated fats | 1.40 (0.35- 2.70)                         | 3.87 (2.17- 5.90)         | 5.31 (3.27- 7.75)         | 8.24 (5.26- 12.53)    | <0.001               |
|                                    | Polyunsaturated fats | 0.47 (0.14- 0.83)                         | 1.11 (0.73- 1.54)         | 1.49 (1.01- 2.62)         | 2.64 (1.50- 5.45)     | <0.001               |
| Dietary intake at full day         |                      |                                           |                           |                           |                       |                      |
| Macronutrient composition (%)      |                      |                                           |                           |                           |                       |                      |
|                                    | Proteins             | 18.82 (17.28- 20.48)                      | 18.54 (17.12- 20.26)      | 18.28 (17.03- 19.85)      | 17.92 (16.38- 19.53)  | <0.001               |
|                                    | Carbohydrates        | 39.73 (35.70- 43.59)                      | 41.44 (38.30- 44.93)      | 41.94 (38.41- 45.72)      | 42.68 (39.00- 46.72)  | <0.001               |
|                                    | Fats                 | 37.01 (33.45- 41.09)                      | 36.72 (33.76- 39.73)      | 36.78 (33.20- 40.44)      | 36.91 (33.17- 40.70)  | 0.220                |
| Macronutrient intake (g/day)       |                      |                                           |                           |                           |                       |                      |
|                                    | Total carbohydrates  | 250.35(218.71-283.94)                     | 254.56(225.51-287.14)     | 254.01(223.92-287.09)     | 248.61(215.52-287.17) | 0,034                |
|                                    | Simple carbohydrates | 86.37 (70.48-104.79)                      | 91.73 (75.21-109.47)      | 94.11 (78.65-112.47)      | 98.92 (80.60-118.24)  | <0.001               |
|                                    | Fibre                | 37.35 (30.49- 45.44)                      | 38.29 (31.85- 44.78)      | 36.27 (30.47- 43.21)      | 35.21 (29.12- 42.29)  | <0.001               |
|                                    | Total proteins       | 118.56(104.07-133.83)                     | 115.56(101.11-130.78)     | 111.11 (98.59-124.08)     | 104.90 (92.41-118.98) | <0.001               |
|                                    | Animal proteins      | 73.49 (61.32- 87.66)                      | 69.44 (58.27- 83.36)      | 66.90 (56.71- 78.34)      | 62.27 (50.27- 74.21)  | <0.001               |
|                                    | Plant-based proteins | 44.65 (38.29- 52.04)                      | 45.04 (38.75- 51.46)      | 43.16 (36.95- 50.04)      | 41.83 (35.92- 49.10)  | <0.001               |

|                      |                       |                       |                      |                      |        |
|----------------------|-----------------------|-----------------------|----------------------|----------------------|--------|
| Fats                 | 103.86 (86.90-122.19) | 100.06 (86.00-115.07) | 98.20 (84.29-115.17) | 96.67 (81.01-113.69) | <0.001 |
| Saturated fats       | 27.71 (22.51- 35.12)  | 26.57 (21.82- 32.64)  | 26.26 (21.06- 32.02) | 24.95 (20.08- 30.94) | <0.001 |
| Monounsaturated fats | 46.52 (38.66- 55.33)  | 45.19 (38.49- 53.40)  | 44.80 (37.82- 52.75) | 43.08 (35.04- 52.46) | <0.001 |
| Polyunsaturated fats | 17.97 (14.01- 23.49)  | 17.29 (14.08- 21.98)  | 16.77 (13.44- 22.01) | 17.45 (13.15- 22.37) | 0.002  |

Data are expressed in median (p25-p75).

<sup>1</sup>Breakfast size was calculated as: (energy from breakfast/total energy intake)\*2000kcal

<sup>2</sup>p value: Wilcoxon rank test

**Supplemental Table S3. Odds ratio (95%CI) for chrono-nutrition variables included in the logistic regression model for Metabolic Syndrome.**

|                                   |       |                  |
|-----------------------------------|-------|------------------|
| <b>Breakfast time (h)</b>         |       |                  |
|                                   | ≤9:00 | 1.00 (referent)  |
|                                   | >9:00 | 1.34 (1.14-1.57) |
| <b>Number of eating occasions</b> |       |                  |
|                                   | ≤3    | 0.80 (0.55-1.17) |
|                                   | 4-5   | 1.00 (referent)  |
|                                   | >5    | 1.23 (1.06-1.42) |

Model: adjusted for centre, sex, age, educational level, recreational physical activity, number of eating occasions (≤3, 4-5, >5), breakfast time (≤9:00, >9:00 h), and breakfast size

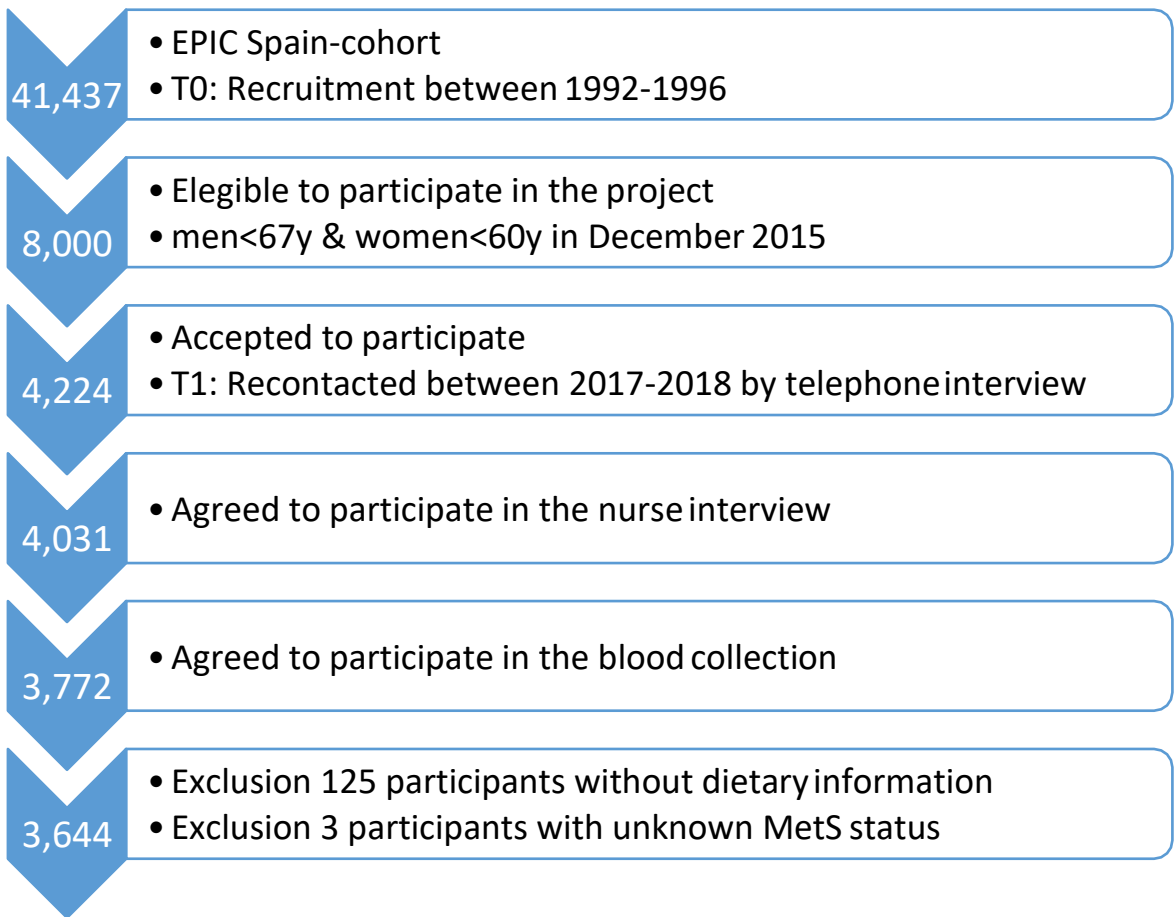

**Supplemental Figure S1. Flowchart Data collection**
